# Supplementary material for: GTPBP8 plays a role in mitoribosome formation in human mitochondria
Source: PubMed Central journal article supplement (PMC11229512; doi:10.1038/s41467-024-50011-x), 2024-07-05
Supplement: 41467_2024_50011_MOESM1_ESM.pdf [file 41467_2024_50011_MOESM1_ESM.pdf]

## **SUPPLEMENTARY INFORMATION**

**GTPBP8 plays a role in mitoribosome formation in human mitochondria**

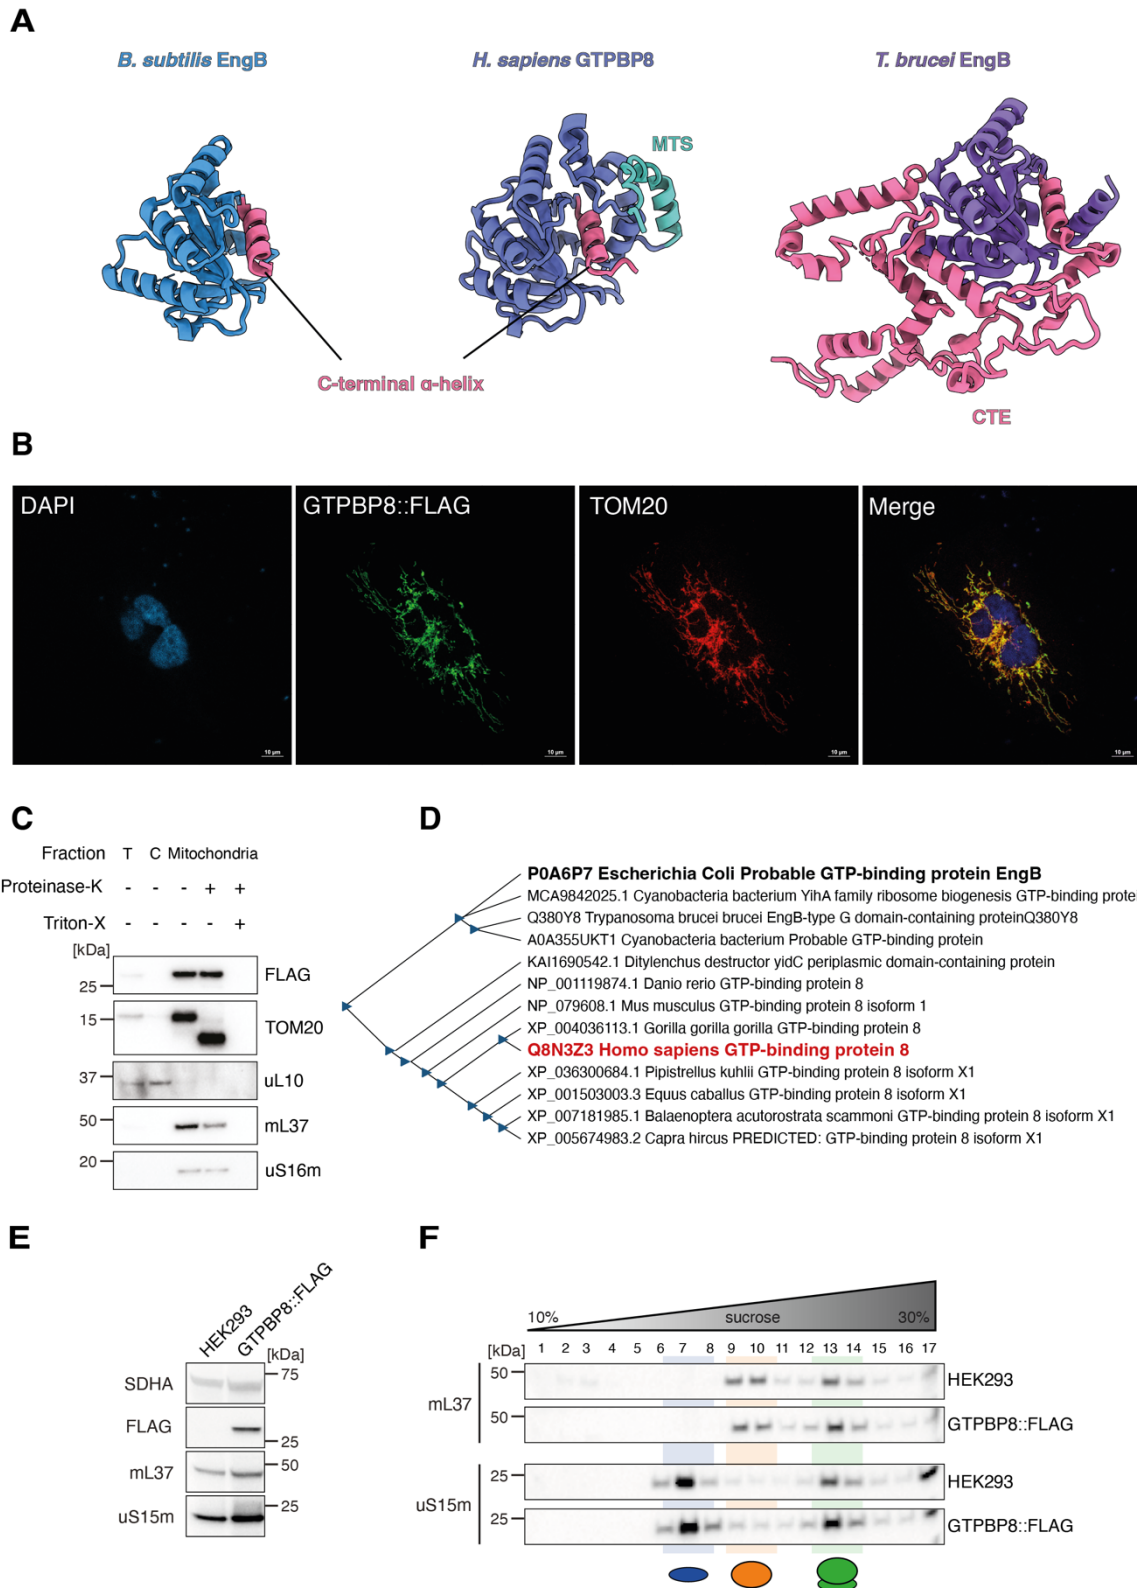

**Supplementary Fig. 1. GTPBP8 localizes in mitochondria in mammalian cells.**

(A) Comparison of 3D structures between *H. sapiens* GTPBP8 (middle), *B. subtilis* EngB (left), and *T. brucei* EngB (right). The predicted structure of human GTPBP8 was retrieved from the AlphaFold Protein Structure Database<sup>1,2</sup> and compared to *B. subtilis* EngB crystal structure<sup>3</sup> and *T. brucei* cryo-EM structure (PDB: 6YXY,<sup>4</sup>). Bacterial EngB and human GTPBP8 C-terminal

helices are highlighted in pink as well as *T. brucei* EngB CTE. GTPBP8 mitochondrial targeting sequence (MTS) is colored light green.

**(B)** HOS cells were transiently transfected with GTPBP8::FLAG cDNA. DAPI (blue) was used to label the cell nuclei. An anti-FLAG antibody was used to identify the GTPBP8::FLAG protein product, and anti-mouse secondary antibody conjugated to Alexa Fluor 488 (green) was used to visualize it. Anti-TOM20 antibody, an integral outer mitochondrial membrane protein, and anti-rabbit secondary antibody coupled to AlexaFluor 568 (red) were used to detect the mitochondrial network. A digitally merged image of DAPI, GTPBP8::FLAG, and TOM20 signals reveals the colocalization of GTPBP8::FLAG within mitochondria.

**(C)** Subcellular fractionation of GTPBP8::FLAG overexpressing cells. Cell lysates were separated into cytosolic and mitochondrial fractions. The mitochondrial fractions were either untreated or treated with 25 µg/ml Proteinase K with or without the addition of 1% Triton X-100. Fractions were further analyzed via western blotting: anti-FLAG antibody was used to detect GTPBP8::FLAG, anti-uL10 (cytosolic ribosomal protein uL10) antibody was used as a marker of the cytosol, anti-TOM20 antibody was used as a marker of the outer mitochondrial membrane, anti-mL37 and anti-uS16m antibodies were used as markers of the mitochondrial matrix. T, total cell lysate; C, cytosol.

**(D)** Phylogenetic analysis of human GTPBP8. The tree was generated using the Geneious software.

**(E)** MRPs steady-state levels in HEK293 overexpressing GTPBP8::FLAG. Mitochondrial lysates from HEK293 and GTPBP8::FLAG overexpressing cells were analyzed via western blotting. Cells were induced with 50 ng/ml of doxycycline prior to the experiment. Membranes were probed with anti-FLAG antibodies to assess GTPBP8 overexpression, anti-mL37 and anti-uS15m antibodies. Anti-SDHA antibody was used as the loading control.

**(F)** Sucrose gradient centrifugation analysis to assess mitoribosome sedimentation patterns in GTPBP8::FLAG overexpressing cells compared to HEK293 control cells. Mitochondrial lysates were loaded onto 10-30 % isokinetic sucrose gradients and obtained fractions were analyzed via western blotting. Membranes were probed for mt-LSU MRP mL37, mt-SSU MRP uS15m and GTPBP8. Source data are provided as a Source Data file.

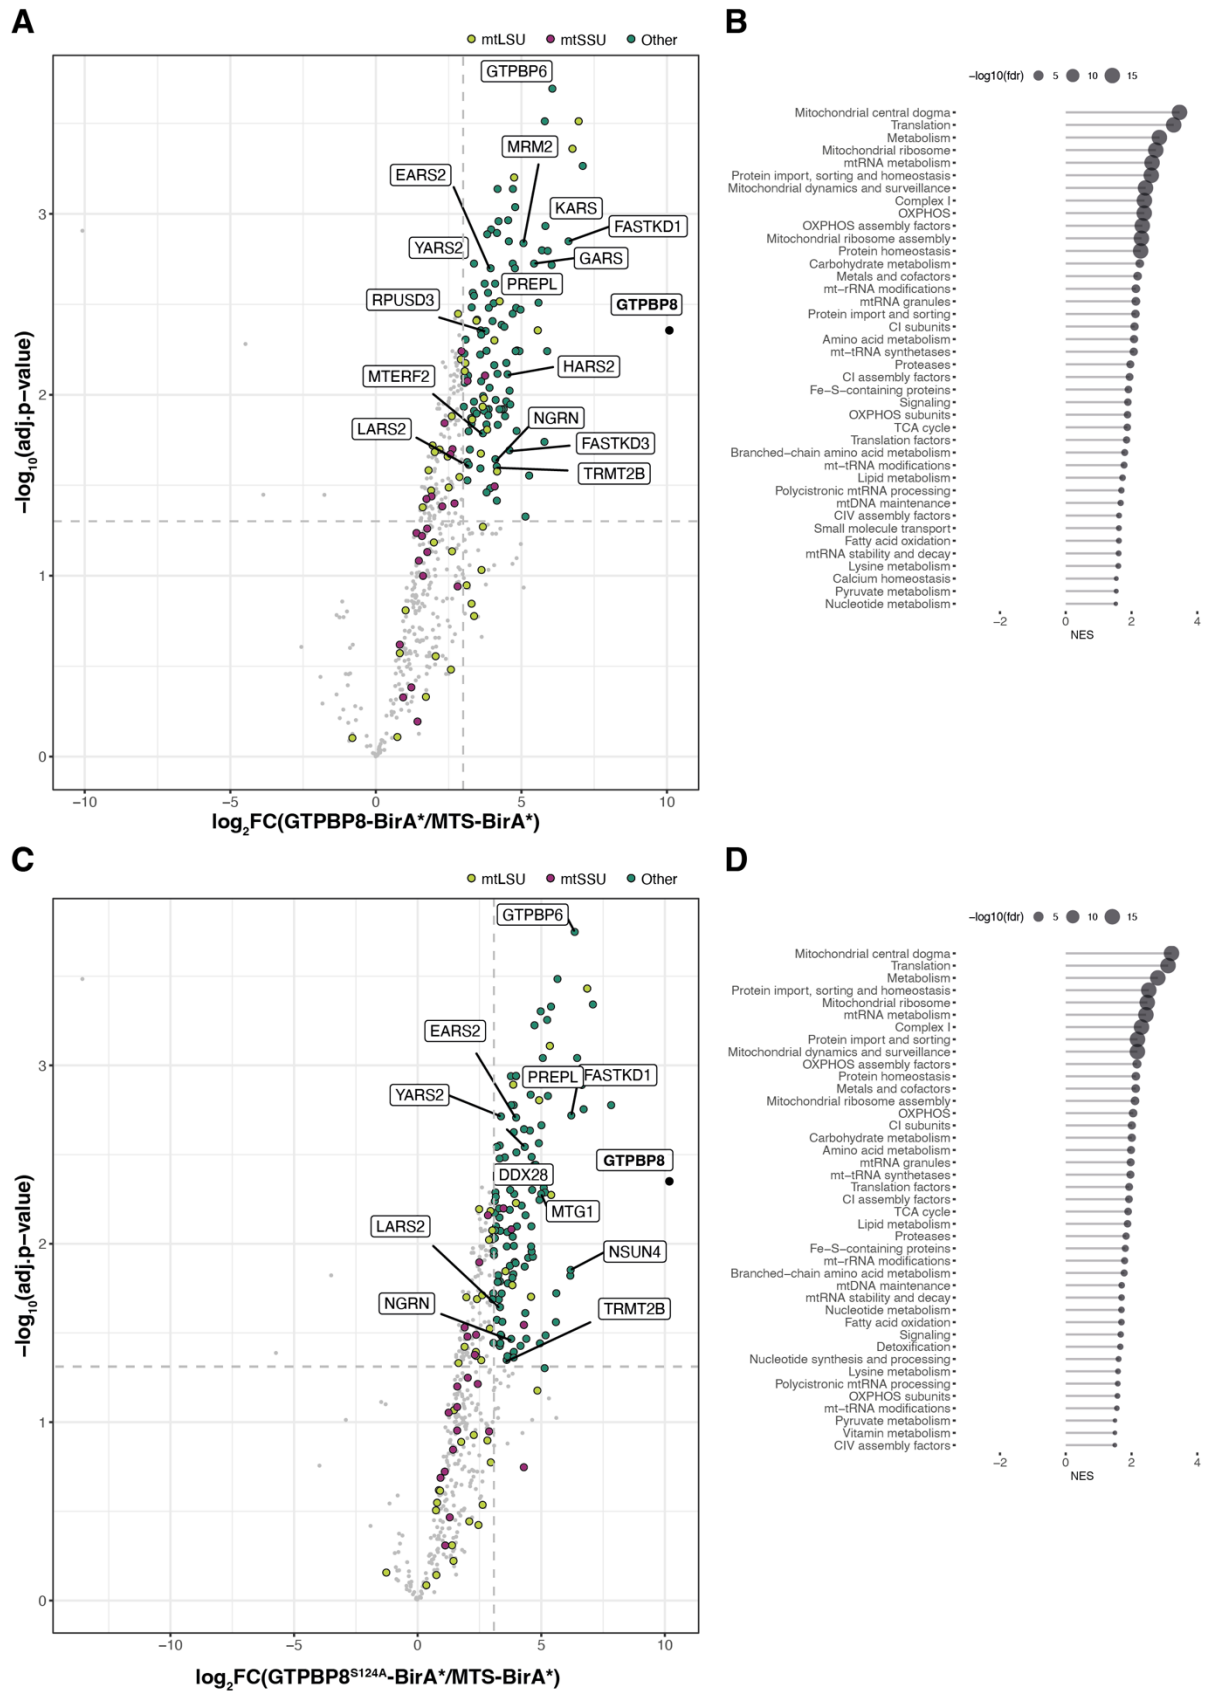

**Supplementary Fig. 2. GTPBP8 BioID analysis.**

(A) Label-free quantitative (LFQ) mass spectrometry analysis following GTPBP8-BioID experiment ( $n = 3$  independent experiments). Mitochondrial targeted BirA\* (MTS-BirA\*) was

used as a control. The  $\log_2(\text{fold change})$  and the  $-\log_{10}(\text{adjusted p-value})$  are displayed on the  $x$ - and  $y$ - axis respectively. The light green dots highlight mt-LSU MRPs, whereas the purple dots highlight mt-SSU MRPs. Other proteins are highlighted in turquoise. The dashed lines (light grey) represent the thresholds of the  $\log_2\text{FC} > 3$  and  $-\log_{10}(\text{adj.p-value}) > 1.3$  ( $\text{adj.p-value} < 0.05$ ). The volcano plot was filtered for mitochondrial proteins as annotated in MitoCarta 3.0. A full annotation of the identified proteins is displayed in Supplementary Data 2.

**(B)** Mitocarta3 pathway enrichment analysis performed using WebGestalt of GTPBP8-BioID results. The  $-\log_{10}$  of the false discovery rate (FDR) and the normalized enrichment score (NES) are indicated.

**(C)** Label-free quantitative (LFQ) mass spectrometry analysis following GTPBP8<sup>S124A</sup>-BioID experiment ( $n = 3$  independent experiments). Mitochondrial targeted BirA\* (MTS-BirA\*) was used as a control. The  $\log_2(\text{fold change})$  and the  $-\log_{10}(\text{adjusted p-value})$  are displayed on the  $x$ - and  $y$ - axis respectively. The light green dots highlight mt-LSU MRPs, whereas the purple dots highlight mt-SSU MRPs. Other proteins are highlighted in turquoise. The dashed lines (light grey) represent the thresholds of the  $\log_2\text{FC} > 3$  and  $-\log_{10}(\text{adj.p-value}) > 1.3$  ( $\text{adj.p-value} < 0.05$ ). The volcano plot was filtered for mitochondrial proteins as annotated in MitoCarta 3.0. A full annotation of the identified proteins is displayed in Supplementary Data 2.

**(D)** Mitocarta3 pathway enrichment analysis performed using WebGestalt of GTPBP8<sup>S124A</sup>-BioID results. The  $-\log_{10}$  of the false discovery rate (FDR) and the normalized enrichment score (NES) are indicated.

**A**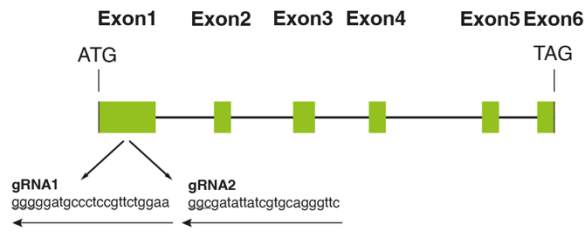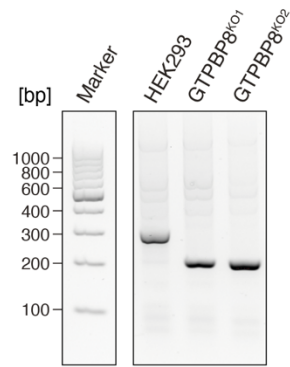**B**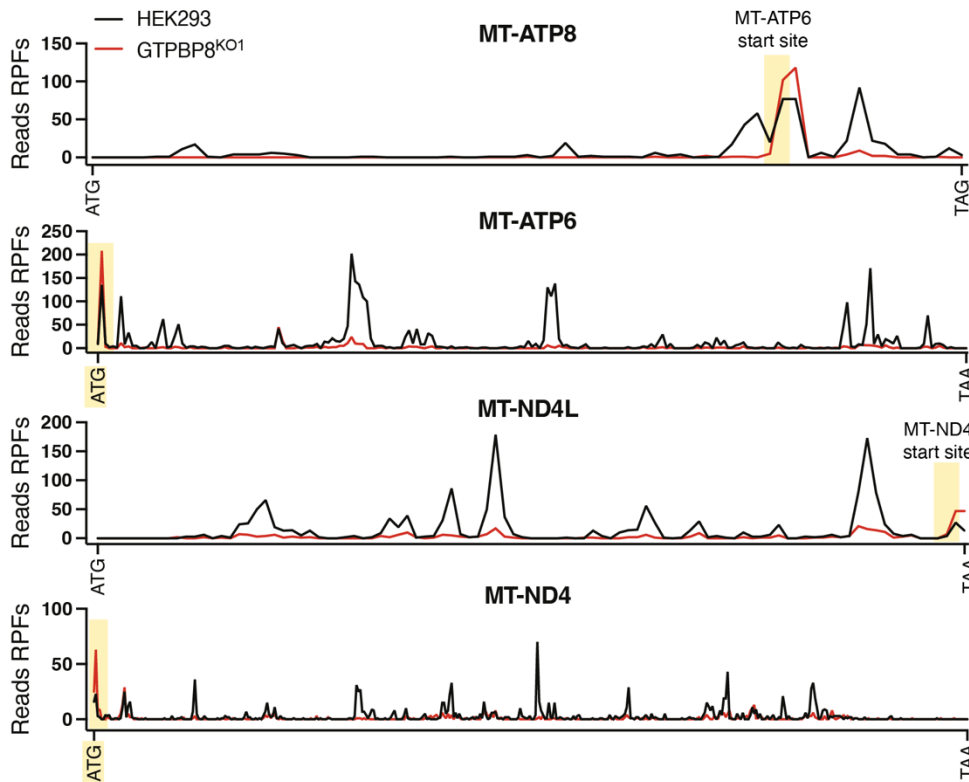**C**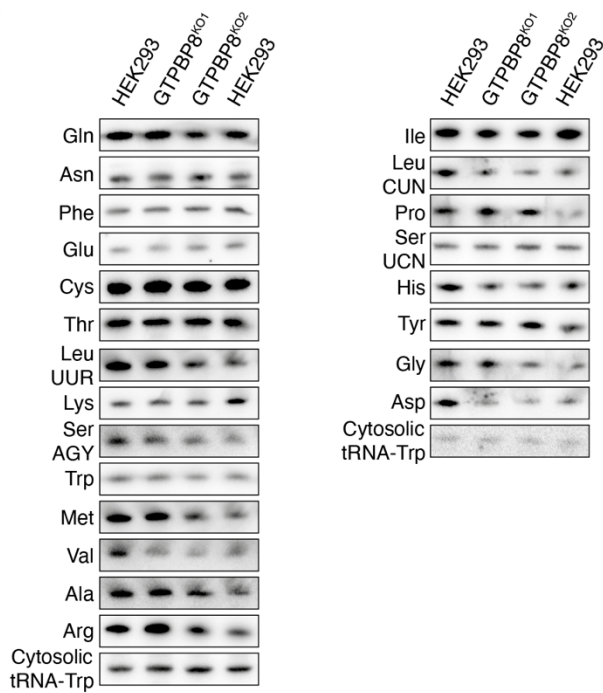**D**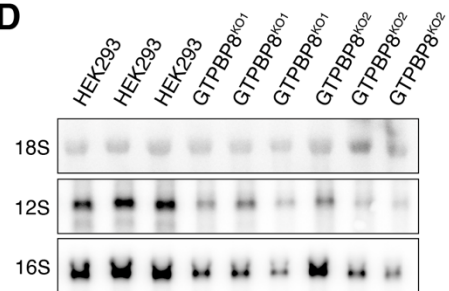

**Supplementary Fig. 3. Generation of GTPBP8 knock-out model and its effect on mitochondrial gene expression.**

**(A)** CRISPR/Cas9 mediated targeted GTPBP8 knock-out. The schematic indicates the target sites of gRNAs within the protein-coding exon 1. Underlined sequences represent the PAM sites.

On the right, PCR analysis was performed targeting *GTPBP8* exon 1 gRNAs cutting sites.

**(B)** Representation of the RPFs profiles on ATP8/ATP6 and ND4L/ND4 transcripts in GTPBP8<sup>KO1</sup> (red) compared to HEK293 (black). The start (ATG) and the stop (TAA) codons are indicated.

**(C)** Northern blotting to assess steady-state levels of mt-tRNAs in GTPBP8<sup>KO1</sup> and GTPBP8<sup>KO2</sup> compared to HEK293. The cytosolic tRNA for tryptophan (tRNA-Trp) was used as a loading control.

**(D)** Northern blotting to assess steady-state levels of mt-rRNAs in GTPBP8<sup>KO1</sup> and GTPBP8<sup>KO2</sup> compared to HEK293. Nuclear-encoded 18S rRNA was used as a loading control. Source data are provided as a Source Data file.

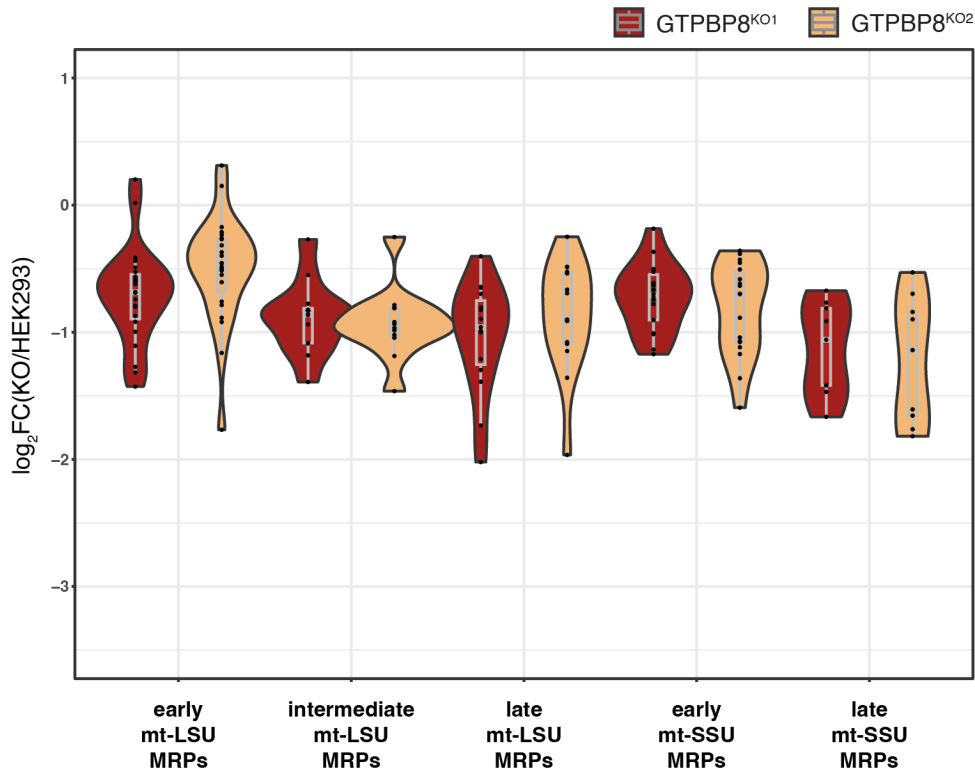

**Supplementary Fig. 4. Effect of GTPBP8 loss on mitoribosome assembly.**

LFQ mass spectrometry analyses of early, intermediate and late mt-LSU MRPs and early and late mt-SSU MRPs based on<sup>5</sup> in GTPBP8<sup>KO1</sup> and GTPBP8<sup>KO2</sup> cell lines compared to HEK293 ( $n = 3$  independent experiments). Log<sub>2</sub>(FC) of GTPBP8<sup>KO1</sup> vs HEK293 (red) and GTPBP8<sup>KO2</sup> vs HEK293 (yellow) is represented on the  $y$ -axis. Summary of violin plots: early mt-LSU KO1 (median = -0.6860, min = -1.427, max = 0.202, q1 = -0.89500, q3 = -0.54400); early mt-LSU KO2 (median = -0.4580, min = -1.163, max = 0.312, q1 = -0.68250, q3 = -0.26400); intermediate mt-LSU KO1 (median = -0.8620, min = -1.391, max = -0.27, q1 = -1.08475, q3 = -0.81100); intermediate mt-LSU KO2 (median = -0.9495, min = -1.463, max = -0.251, q1 = -1.02650, q3 = -0.80950); late mt-LSU KO1 (median = -0.9610, min = -2.021, max = -0.403, q1 = -1.25450, q3 = -0.75100); late mt-LSU KO2 (median = -0.9000, min = -1.965, max = -0.249, q1 = -1.08450, q3 = -0.53100); early mt-SSU KO1 (median = -0.7125, min = -1.172, max = -0.185, q1 = -0.90350, q3 = -0.54575); early mt-SSU KO2 (median = -0.6980, min = -1.593, max = -0.359, q1 = -1.07550, q3 = -0.52500); late mt-SSU KO1 (median = -1.0590, min = -1.665, max = -0.673, q1 = -1.41800, q3 = -0.81100); late mt-SSU KO2 (median = -1.1400, min = -1.818, max = -0.529, q1 = -1.65600, q3 = -0.84000). The complete list of log<sub>2</sub>(FC) values is presented in Supplementary Data 3.



**A**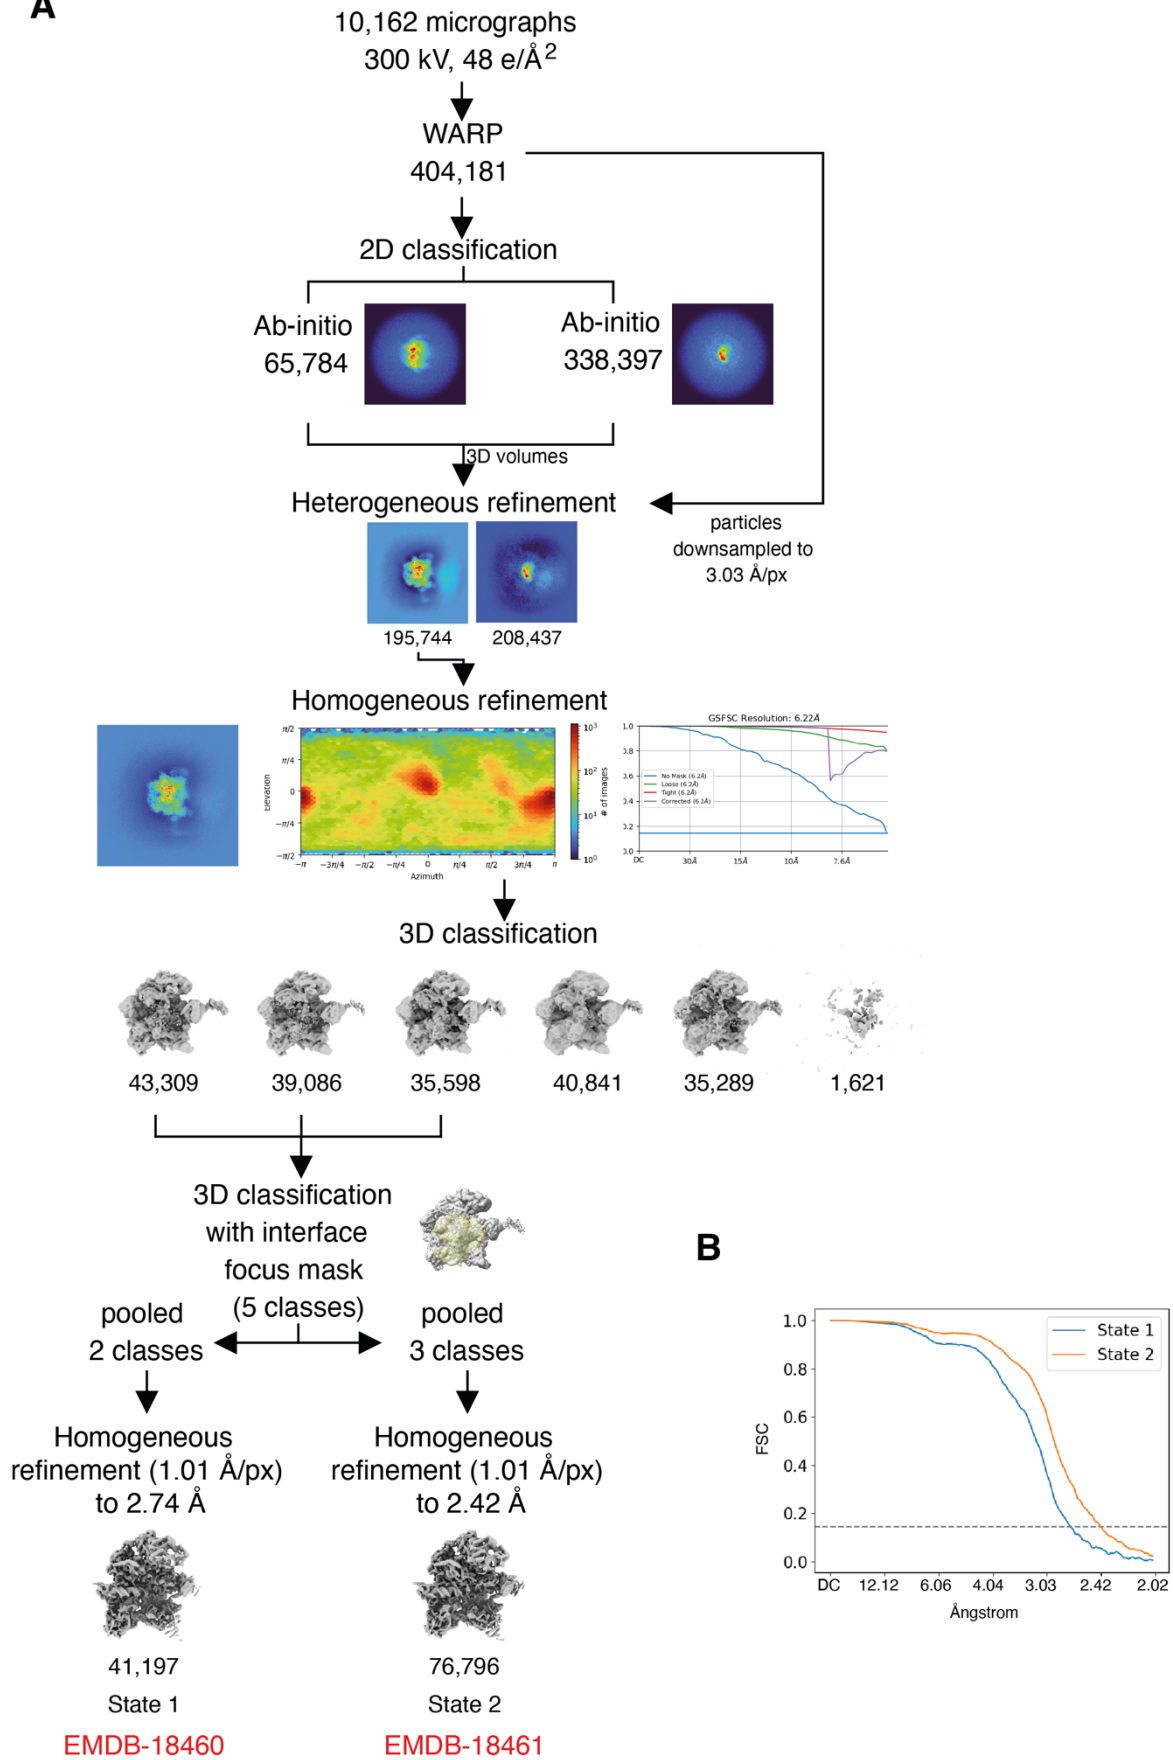

Supplementary Fig. 5. Data processing of the mt-LSU sample from GTPBP8<sup>KO1</sup> cells.

**(A)** Data processing strategy for the mt-LSU assembly intermediates derived from GTPBP8<sup>KO1</sup> cells. The homogeneous reconstruction as well as State 1 and State 2 3D classes are deposited as EMDB-18460 and EMDB-18461, respectively. For the homogenous refinement, the 3D particle poses and the half-maps FSC from CryoSPARC v4 are shown.

**(B)** Gold-standard Fourier shell correlation (FSC) for the two EMDB-deposited reconstructions. The horizontal dashed line indicates the FSC cut-off at 0.143.

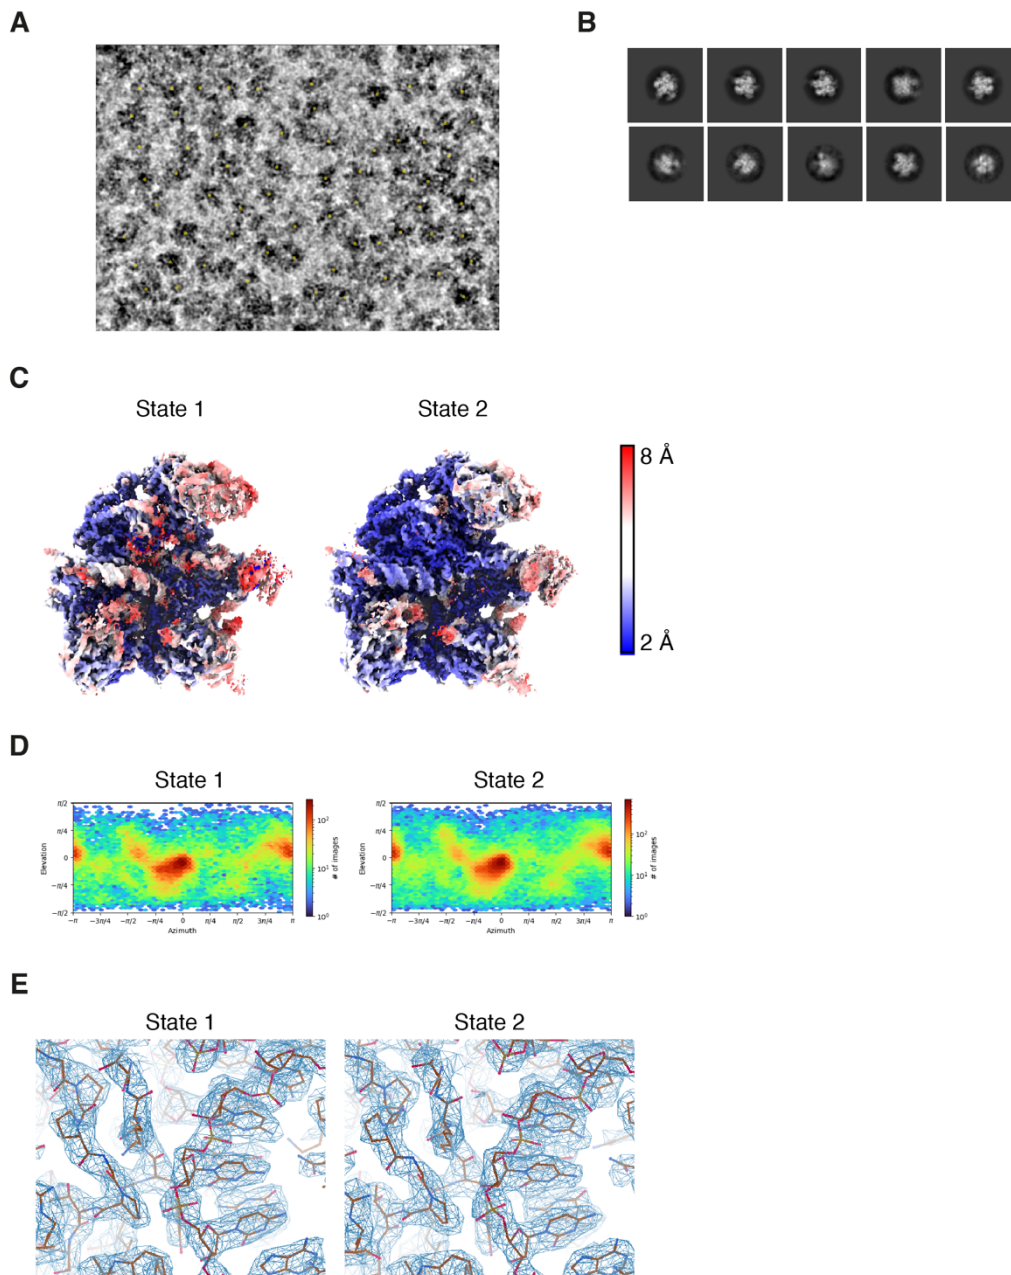

**Supplementary Fig. 6. Data processing of the mt-LSU sample from GTPBP8<sup>KO1</sup> cells.**

(A) Representative micrograph for the mt-LSU dataset. The micrograph was deconvolved in WARP<sup>5</sup> for visualization. The picked particle coordinates are shown with yellow dots.

(B) Selected 2D classes.

(C) Local resolution estimation (FSC threshold 0.5) calculated by BlocRes<sup>6</sup> as implemented in cryoSPARC v4.3.0.

(D) Distribution of particle orientations (Obtained from CryoSPARC v4.3.0).

(E) Representative cryo-EM density (state 1, 5.4 RMSD; state 2, 4.5 RMSD).

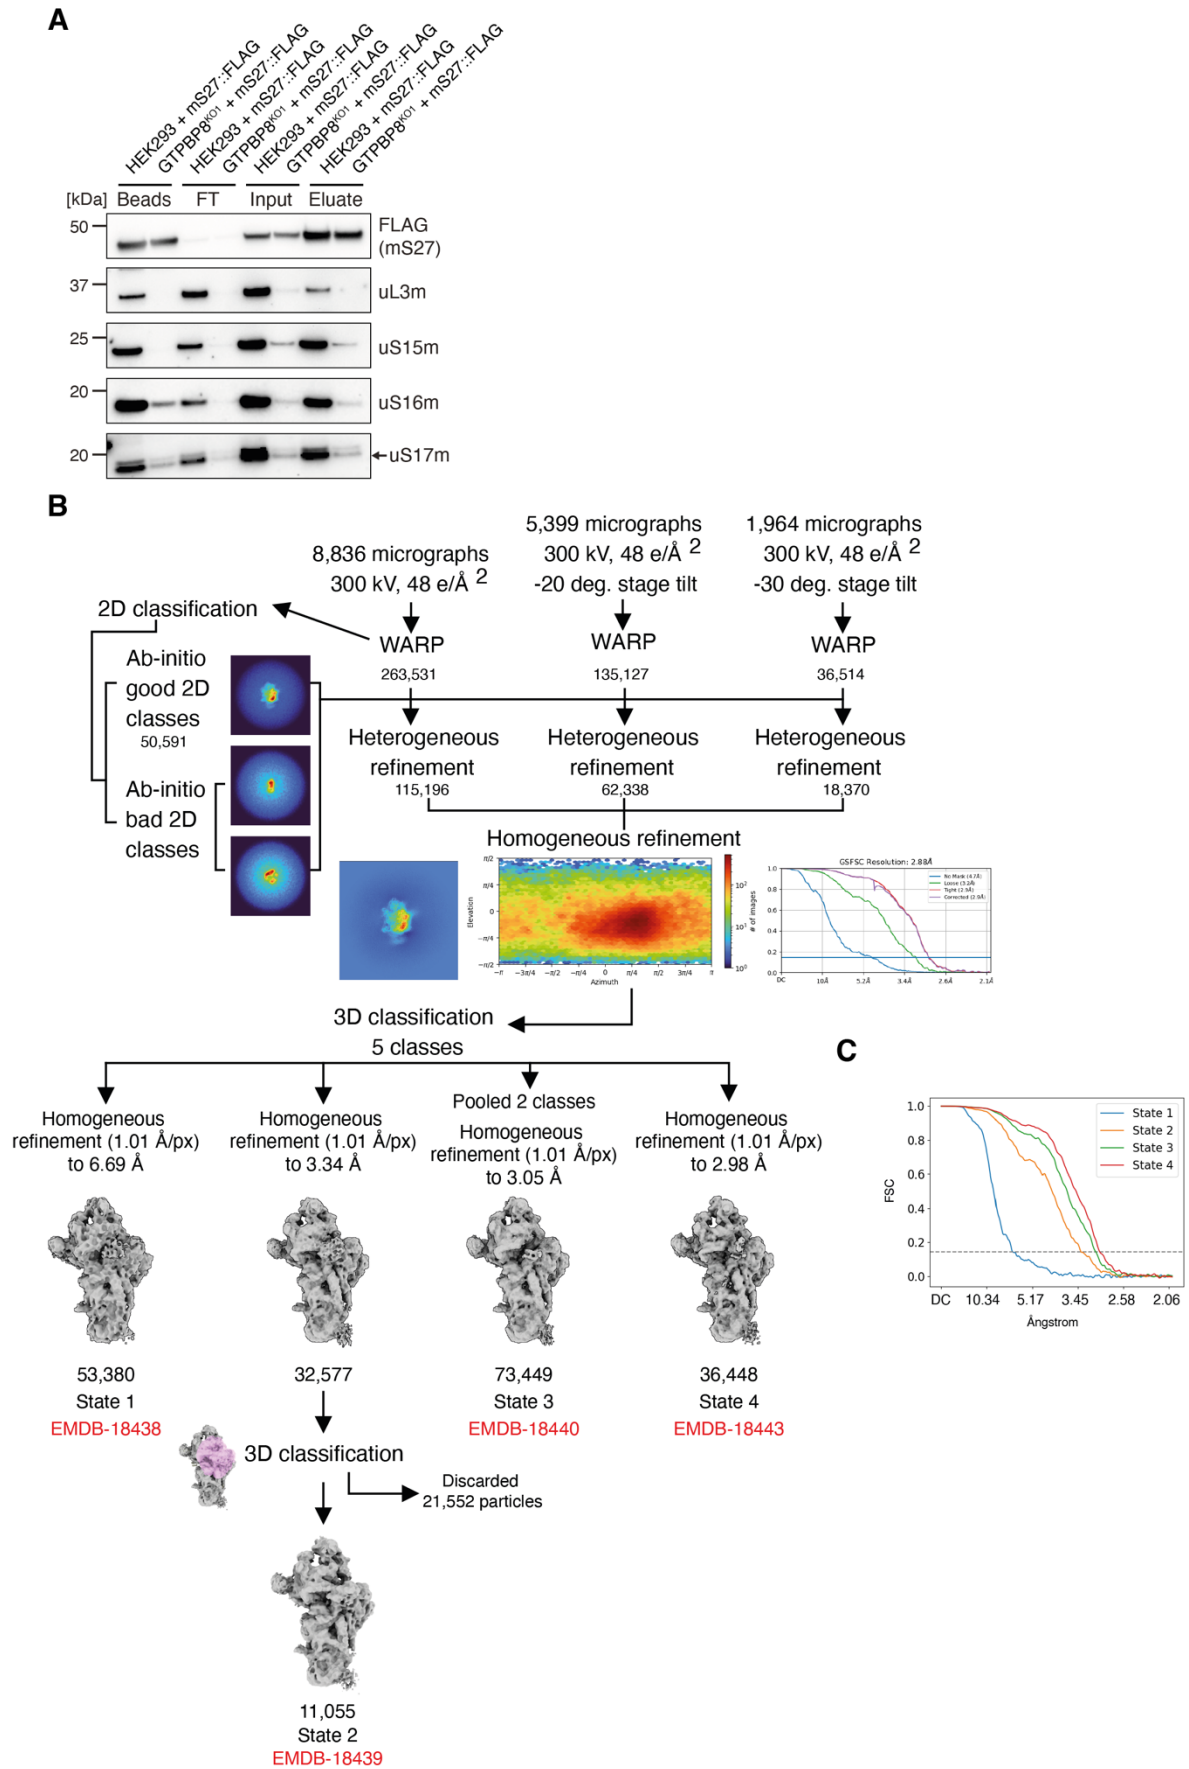

Supplementary Fig. 7. Data processing of the mt-SSU sample from GTPBP8<sup>KO1</sup> cells.

**(A)** Immunoblotting of mS27::FLAG-IP from GTPBP8<sup>KO1</sup> cells. Beads, flow-through (FT), mitochondrial lysates (Input) and eluates from HEK293 overexpressing mS27::FLAG and GTPBP8<sup>KO1</sup> overexpressing mS27::FLAG were resolved via SDS-PAGE. Membranes were probed with antibodies against FLAG and for the mt-LSU MRP uL3m, and the mt-SSU MRPs uS15m, uS16m, and uS17m. Source data are provided as a Source Data file.

**(B)** Data processing strategy for the mt-SSU particles obtained by mS27 immunoprecipitation from GTPBP8<sup>KO1</sup> cells. The homogeneous reconstruction as well as State 1, 2, 3 and 4 3D classes are deposited as EMDB-18438, EMDB-18439, EMDB-18440, EMDB-18443, respectively. For the homogenous refinement, the 3D particle poses and the half-maps FSC from CryoSPARC v4 are shown.

**(C)** Gold-standard Fourier shell correlation (FSC) for the four EMDB-deposited reconstructions. The horizontal dashed line indicates the FSC cut-off at 0.143.

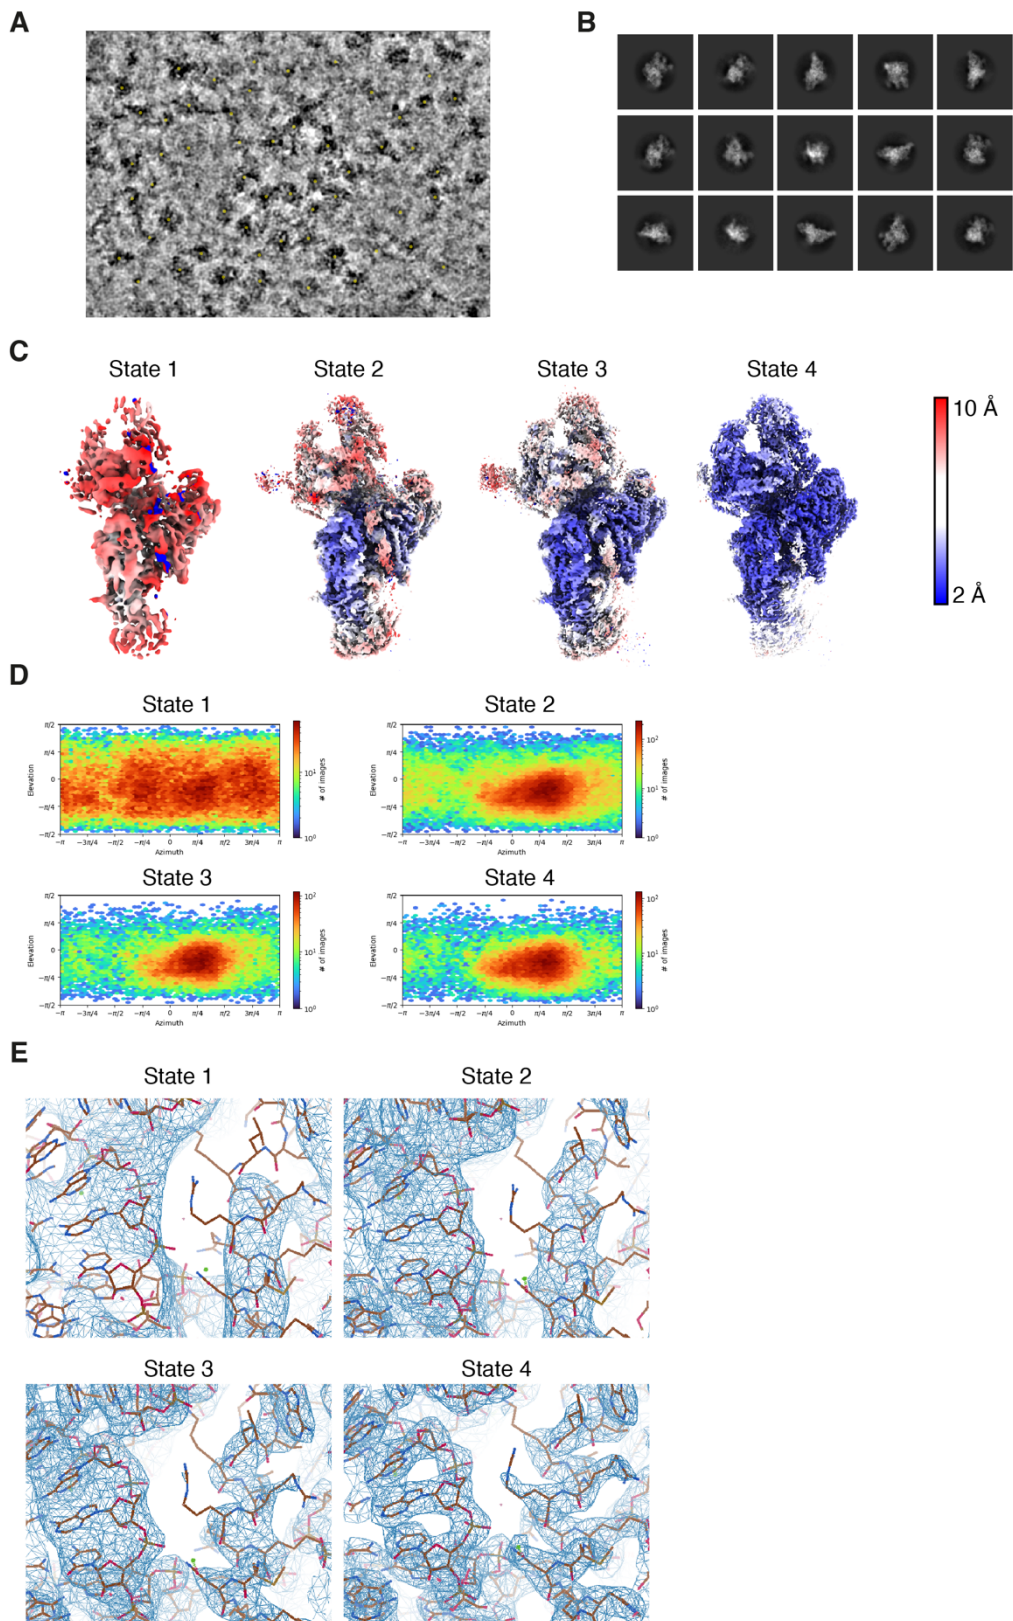

Supplementary Fig. 8. Data processing of the mt-SSU sample from GTPBP8<sup>KO1</sup> cells.

- (A)** Representative micrograph for the mt-SSU dataset. The micrograph was deconvolved in WARP <sup>6</sup> for visualization. The picked particle coordinates are shown with yellow dots.
- (B)** Selected 2D classes.
- (C)** Local resolution estimation (FSC threshold 0.5) calculated by BlocRes <sup>7</sup> as implemented in cryoSPARC v4.3.0.
- (D)** Distribution of particle orientations (Obtained from CryoSPARC v4.3.0).
- (E)** Representative cryo-EM density (state 1, 4.5 RMSD; state 2, 4.8 RMSD; state 3, 5.6 RMSD; state 4, 4.9 RMSD).

**A**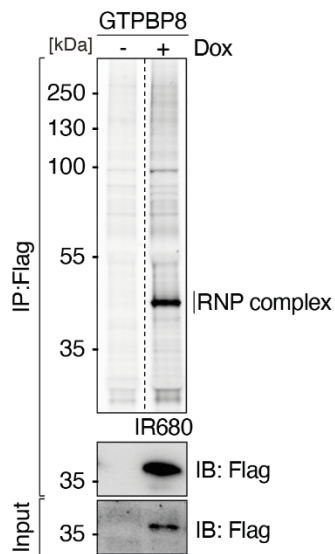**B**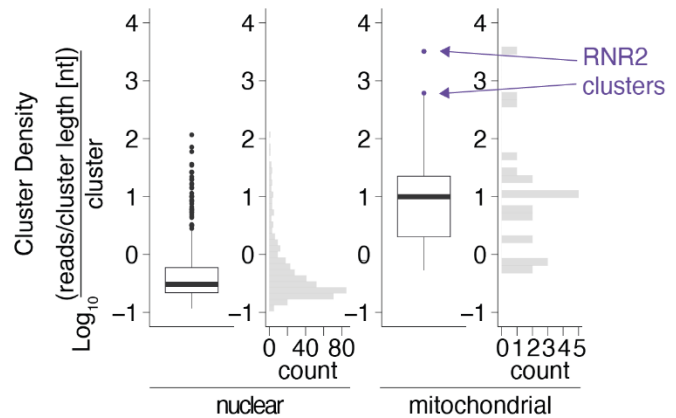

### Supplementary Fig. 9. fPAR-CLIP analysis

**(A)** IR680 fluorescent image of crosslinked and fluorescent adapter-ligated GTPBP8::FLAG ribonucleoprotein complexes in HEK293 cells with or without doxycycline induction. GTPBP8::FLAG immunoblots depict the efficiency of the pulldown and doxycycline induction ( $n = 3$  independent experiments). Source data are provided as a Source Data file.

**(B)** GTPBP8 RNA binding sites (coined clusters by standard fPAR-CLIP analysis) were parsed by nuclear and mitochondrial encoded transcripts. Reads per cluster median and distribution is presented (T-test  $p$ -value= $1.74 \times 10^{-6}$ ), as well as the orthogonal histogram of the prevalence of cluster per cluster intensity (reads/cluster). Clusters along the 16S mt-rRNA (RNR2) are colored in purple.



**Supplementary Table 1. List of primers used for gene cloning**

| <b>Primer Sequence (5'→3')</b>            |                                                                    |
|-------------------------------------------|--------------------------------------------------------------------|
| BamHI_GTPBP8_Fwd<br>(pcDNA5; FLAG-IP)     | CTTTCTTGGATCCAAGGGAGAATGGCGGCGCC                                   |
| GTPBP8_FLAG_XhoI_Rev<br>(pcDNA5; FLAG-IP) | CTTTCTTTCTCGAGCTACTTATCGTCGTCATCCTT<br>GTAATCGTCAAGACTTCCTGTTACTG  |
| GTPBP8_S124A_Fwd                          | ATGTTGGAAAAGCATCTCTAATCAAG                                         |
| GTPBP8_S124A_Rev                          | CTTGATTAGAGATGCTTTTCCAACATT                                        |
| BamHI_mS27_Fwd                            | GAATCGTCTCtGATCGCCGCCACCATGGCTGCCTC<br>CATAGTGCG                   |
| mS27_FLAG_XhoI_Rev                        | GAATCGTCTCtTCGACTACTTATCGTCGTCATCCTT<br>GTAATCGGCAGATGCCTTTGCTGCTT |
| NheI_GTPBP8_Fwd (pcDNA3;<br>BioID)        | CACAGCTAGCATGGCGGCGCCCGGGCTG                                       |
| GTPBP8_BamHI_Rev<br>(pcDNA3; BioID)       | CACAGGATCCGTCAAGACTTCCTGTTACTGCTGGC                                |
| AflII_GTPBP8_Fwd (pcDNA5;<br>BioID)       | CACACTTAAGATGGCGGCGCCCGGGC                                         |
| GTPBP8_NotI_Rev (pcDNA5;<br>BioID)        | CACAGCGGCCGCCTATGCGTAATCCGGTAC                                     |

**Supplementary Table 2. List of Antibodies**

| <b>Antibody</b> | <b>Company</b>                         | <b>Catalog No.</b> |
|-----------------|----------------------------------------|--------------------|
| Anti-FLAG       | Abcam                                  | ab1257             |
| GTPBP8          | Prestige Antibodies, Sigma-<br>Aldrich | HPA034831          |
| GAPDH           | Abcam                                  | ab8245             |
| SDHA            | Abcam                                  | ab14715            |
| MRPL3/uL3m      | Prestige Antibodies, Sigma-<br>Aldrich | HPA043665          |
| MRPL37/mL37     | Prestige Antibodies, Sigma-<br>Aldrich | HPA025826          |
| MRPL12/bL12m    | Prestige Antibodies, Sigma-<br>Aldrich | HPA022853          |

|                      |                                    |            |
|----------------------|------------------------------------|------------|
| MRPL28/bL28m         | Prestige Antibodies, Sigma-Aldrich | HPA030594  |
| MRPL49/mL49          | Proteintech Group                  | 15542-1-AP |
| MRPL15/uL15m         | Proteintech Group                  | 18339-1-AP |
| MRPS16/uS16m         | Prestige Antibodies, Sigma-Aldrich | HPA054538  |
| MRPS37/mS37 (CHCHD1) | Invitrogen                         | PA-58635   |
| MRPS15/uS15m         | Proteintech Group                  | 17006-1    |
| MRPS17/uS17m         | Proteintech Group                  | 18881-1    |
| MRPS22/mS22          | Thermo Fisher                      | 10984-1-AP |
| RPLP0/uL10           | Invitrogen                         | PA5-89335  |
| OXPHOS human WB      | Abcam                              | ab110411   |
| TOM20                | Santa-Cruz                         | sc-11415   |
| MTG1                 | Prestige Antibodies, Sigma-Aldrich | HPA037827  |
| MRM3/RNMTL1          | Prestige Antibodies, Sigma-Aldrich | HPA023292  |
| RBFA                 | Abcam                              | ab224741   |
| GTPBP10              | Prestige Antibodies, Sigma-Aldrich | HPA021076  |
| TRMT10C              | Prestige Antibodies, Sigma-Aldrich | HPA036671  |
| HRP secondary rabbit | GE Healthcare                      | NA9340V    |
| HRP secondary mouse  | GE Healthcare                      | NA9310V    |
| HRP secondary goat   | Santa-Cruz                         | sc-2354    |

**Supplementary Table 3. List of primers for rRNAs and tRNAs**

| Primer<br>(5'→3') | Sequence              |
|-------------------|-----------------------|
| 12S_Fwd           | CACTGAAAATGTTTAGACGGG |
| 12S_Rev           | GGCTCCTCTAGAGGGATATG  |
| 16S_Fwd           | TAGATATAGTACCGCAAGGG  |
| 16S_Rev           | GACTTGTTGGTTGATTGTA   |

|                   |                                                      |
|-------------------|------------------------------------------------------|
| H_T7_Met_68_Fwd   | TAATACGACTCACTATAGGGAGACtagtacgggaagggtataacc        |
| H_Met_68_Rev      | agtaaggtcagctaaataagctatc                            |
| H_T7_Val_69_Fwd   | TAATACGACTCACTATAGGGAGACtcagagcgggtcaagttaagttg      |
| H_Val_69_Rev      | cagagtgtagcttaacacaaagc                              |
| L_T7_Gln_72_Fwd   | TAATACGACTCACTATAGGGAGACctaggactatgagaatcgaac        |
| L_Gln_72_Rev      | taggatgggggtgatagg                                   |
| L_T7_Tyr_66_Fwd   | TAATACGACTCACTATAGGGAGACtggtaaaaagaggcctaacc         |
| L_Tyr_66_Rev      | ggtaaatggctgagtgaagc                                 |
| L_T7_Pro_68_Fwd   | TAATACGACTCACTATAGGGAGACtcagagaaaaagtctttaactc       |
| L_Pro_68_Rev      | cagagaatagtttaaattagaatc                             |
| L_T7_Glu_69_Fwd   | TAATACGACTCACTATAGGGAGACtattctcgcacggactacaac        |
| L_Glu_69_Rev      | gttctttagttgaaatacaacg                               |
| L_T7SerUCN_69_Fwd | TAATACGACTCACTATAGGGAGACcaaaaaaggaaggaatcgaacc       |
| L_SerUCN_69_Rev   | gaaaaagtcatggaggccatg                                |
| L_T7_Cys_66_Fwd   | TAATACGACTCACTATAGGGAGACaagccccggcaggtttgaag         |
| L_Cys_66_Rev      | agctccgaggtgatttcatattg                              |
| L_T7_Asn_73_Fwd   | TAATACGACTCACTATAGGGAGACctagaccaatgggacttaaac        |
| L_Asn_73_Rev      | tagattgaagccagttgattag                               |
| L_T7_Ala_69_Fwd   | TAATACGACTCACTATAGGGAGACtaaggactgcaaaacccac          |
| L_Ala_69_Rev      | aagggttagcttaattaaagtgg                              |
| H_T7_Phe_71_Fwd   | TAATACGACTCACTATAGGGAGACgtttatggggtgatgtgag          |
| H_Phe_71_Rev      | gtttatgtagcttacctctc                                 |
| H_T7LeuUUR_75_Fwd | TAATACGACTCACTATAGGGAGACgttaagaagaggaattgaacctc<br>d |
| H_LeuUUR_75_Rev   | gtaagatggcagagcccgg                                  |
| H_T7_Ile_69_Fwd   | TAATACGACTCACTATAGGGAGACtagaaataagggggttaagctc       |
| H_Ile_69_Rev      | agaaatatgtctgataaaagagttac                           |
| H_T7_Trp_68_Fwd   | TAATACGACTCACTATAGGGAGACcagaaattaagtattgcaacttac     |
| H_Trp_68_Rev      | agaaatttaggttaaatacagacc                             |
| H_T7_Asp_68_Fwd   | TAATACGACTCACTATAGGGAGACtaagatatataggatttagcctata    |
| H_Asp_68_Rev      | aaggtattagaaaaaccatttcat                             |

|                   |                                                         |
|-------------------|---------------------------------------------------------|
| H_T7_Lys_70_Fwd   | TAATACGACTCACTATAGGGAGACtactgtaaagagggtgttg             |
| H_Lys_70_Rev      | cactgtaaagctaacttagcat                                  |
| H_T7_Gly_68_Fwd   | TAATACGACTCACTATAGGGAGACtactctttttgaatgttgcaaaac        |
| H_Gly_68_Rev      | actcttttagtataaatagtagcg                                |
| H_T7_Arg_65_Fwd   | TAATACGACTCACTATAGGGAGACtggtaaatatgattatcataattta<br>tg |
| H_Arg_65_Rev      | tggtatatagttaaacaacga                                   |
| H_T7_His_69_Fwd   | TAATACGACTCACTATAGGGAGACggtaaataaggggtcgaagc            |
| H_His_69_Rev      | gtaaatatagttaaacaacatcag                                |
| H_T7SerAGY_59_Fwd | TAATACGACTCACTATAGGGAGACtgagaaagccatgttgtagac<br>d      |
| H_SerAGY_59_Rev   | gagaaagctcacaagaactg                                    |
| H_T7LeuCUN_71_Fwd | TAATACGACTCACTATAGGGAGACtacttttattggagtgcacc<br>d       |
| H_LeuCUN_71_Rev   | acttttaaaggataacagctatcc                                |
| H_T7_Thr_66_Fwd   | TAATACGACTCACTATAGGGAGACgtccttggaaggggttttcac<br>t      |
| H_Thr_66_Rev      | gtccttgtagtataaactaatacac                               |

**Supplementary Table 4. List of TaqMan probes (Invitrogen)**

| <b>TaqMan probe Assay ID</b> |            |
|------------------------------|------------|
| ACTB                         | Hs99999903 |
| MT-ND1                       | Hs02596873 |
| MT-ND2                       | Hs02596874 |
| MT-ND3                       | Hs02596875 |
| MT-ND4                       | Hs02596876 |
| MT-ND5                       | Hs02596878 |
| MT-ND6                       | Hs02596879 |
| MT-CYTB                      | Hs02596867 |
| MT-COX1                      | Hs02596864 |
| MT-COX2                      | Hs02596865 |
| MT-COX3                      | Hs02596866 |
| MT-ATP6                      | Hs02596862 |

|         |            |
|---------|------------|
| MT-ATP8 | Hs02596863 |
| MT-RNR1 | Hs02596859 |
| MT-RNR2 | Hs02596860 |

**Supplementary Table 5. fPAR-CLIP adaptor sequences and primers**

| Oligo name                       | Sequence                                                                             |
|----------------------------------|--------------------------------------------------------------------------------------|
| 3' adapter                       | 5'-rAppNNTGACTGTGGAATTCTCGGGT(fi)GCCAAGG-(fi) (MDX-O-226-29.51-2xAF660, Multiplexdx) |
| 5' adapter                       | 5'(aminolinker- )G TTCAGAGTTCTACAGTCCGACGATCrNrNrNrN (MDX-O-264, Multiplexdx)        |
| RT Primer                        | GCCTTGGCACCCGAGAATTCCA                                                               |
| 5' short PCR primer              | CTTCAGAGTTCTACAGTCCGACGA                                                             |
| 5' long PCR primer               | AATGATACGGCGACCACCGAGATCTACACGTTTCAGAGTTCTACAGTCCGA                                  |
| GTPBP8 Dox1<br>3' Index primer   | CAAGCAGAAGACGGCATAACGAGATACGGTCTTGTGACTGGAGTTCCTTGGCACCCGAGAATTCCA                   |
| GTPBP8 Dox2<br>3' Index primer   | CAAGCAGAAGACGGCATAACGAGATTCTCGCAAGTGACTGGAGTTCCTTGGCACCCGAGAATTCCA                   |
| GTPBP8 Dox3<br>3' Index primer   | CAAGCAGAAGACGGCATAACGAGATGGAATTGCGTGACTGGAGTTCCTTGGCACCCGAGAATTCCA                   |
| GTPBP8 NoDox1<br>3' Index primer | CAAGCAGAAGACGGCATAACGAGATCTTCACCAGTGACTGGAGTTCCTTGGCACCCGAGAATTCCA                   |

**Supplementary Table 6. Cryo-EM data collection, refinement and validation statistics**

|                                                     | mt-SSU                                    |                                           |                                               |                                           | mt-LSU                                    |                                           |
|-----------------------------------------------------|-------------------------------------------|-------------------------------------------|-----------------------------------------------|-------------------------------------------|-------------------------------------------|-------------------------------------------|
|                                                     | State 1<br>(EMDB-<br>18438)<br>(PDB-8QRK) | State 2<br>(EMDB-<br>18439)<br>(PDB-8QRL) | State 3<br>(EMDB-<br>18440)<br>(PDB-<br>8QRM) | State 4<br>(EMDB-<br>18443)<br>(PDB-8QRN) | State 1<br>(EMDB-<br>18460)<br>(PDB-8QU1) | State 2<br>(EMDB-<br>18461)<br>(PDB-8QU5) |
| <b>Data collection and processing</b>               |                                           |                                           |                                               |                                           |                                           |                                           |
| Magnification                                       | 165,000                                   | 165,000                                   | 165,000                                       | 165,000                                   | 165,000                                   | 165,000                                   |
| Voltage (kV)                                        | 300                                       | 300                                       | 300                                           | 300                                       | 300                                       | 300                                       |
| Electron exposure (e <sup>-</sup> /Å <sup>2</sup> ) | 48                                        | 48                                        | 48                                            | 48                                        | 48                                        | 48                                        |
| Defocus range (µm)                                  | 0.2-2                                     | 0.2-2                                     | 0.2-2                                         | 0.2-2                                     | 0.2-2                                     | 0.2-2                                     |
| Pixel size (Å)                                      | 1.01                                      | 1.01                                      | 1.01                                          | 1.01                                      | 1.01                                      | 1.01                                      |
| Symmetry imposed                                    | P1                                        | P1                                        | P1                                            | P1                                        | P1                                        | P1                                        |
| Initial particle images (no.)                       | 195,904                                   | 195,904                                   | 195,904                                       | 195,904                                   | 404,181                                   | 404,181                                   |
| Final particle images (no.)                         | 53,380                                    | 11,055                                    | 73,499                                        | 36,448                                    | 41,197                                    | 76,769                                    |
| Map resolution (Å)                                  | 6.69                                      | 3.96                                      | 3.05                                          | 2.98                                      | 2.74                                      | 2.42                                      |
| FSC threshold                                       | 0.143                                     | 0.143                                     | 0.143                                         | 0.143                                     | 0.143                                     | 0.143                                     |
| Map resolution range (Å) <sup>1</sup>               |                                           |                                           |                                               |                                           |                                           |                                           |
| Min                                                 | 2.103                                     | 2.144                                     | 2.623                                         | 2.563                                     | 2.204                                     | 2.229                                     |
| 25th percentile                                     | 7.966                                     | 6.961                                     | 4.816                                         | 3.825                                     | 3.905                                     | 3.245                                     |
| Median                                              | 9.034                                     | 9.070                                     | 6.878                                         | 6.264                                     | 6.733                                     | 6.009                                     |
| 75th percentile                                     | 10.768                                    | 11.309                                    | 8.575                                         | 8.529                                     | 8.790                                     | 7.972                                     |
| Max                                                 | 56.458                                    | 68.589                                    | 53.385                                        | 48.289                                    | 48.306                                    | 42.956                                    |
| <b>Refinement</b>                                   |                                           |                                           |                                               |                                           |                                           |                                           |
| Initial model used (PDB code)                       | 6RW4                                      | 7PNX                                      | 6RW4                                          | 7PO2                                      | 5OOM                                      | 5OOM                                      |
| Model resolution (Å)                                | 6.69                                      | 3.34                                      | 3.05                                          | 2.9                                       | 2.74                                      | 2.42                                      |
| FSC threshold                                       | 0.143                                     | 0.143                                     | 0.143                                         | 0.143                                     | 0.143                                     | 0.143                                     |
| Map sharpening <i>B</i> factor (Å <sup>2</sup> )    | 351.0                                     | 30.1                                      | 40.2                                          | 39.4                                      | 25.6                                      | 27.2                                      |
| Model composition                                   |                                           |                                           |                                               |                                           |                                           |                                           |
| Non-hydrogen atoms                                  | 66293                                     | 70955                                     | 68786                                         | 73195                                     | 85686                                     | 89817                                     |
| Protein residues                                    | 5600                                      | 5932                                      | 5910                                          | 6287                                      | 7881                                      | 8105                                      |
| Ligands:                                            |                                           |                                           |                                               |                                           |                                           |                                           |
| GNP/ZN/NAD/K/MG/SPM/ATP/SRY/FES/PNS/5FO/U           | 1/1/1/17/60/1                             | 0/1/1/16/64/0                             | 1/1/1/17/60/1                                 | 1/1/1/18/58/1                             | 0/2/0/0/30/0/                             | 0/2/0/0/48/0/                             |
| NK                                                  | 1/1/2/0/0/0                               | 1/0/2/0/1/0                               | 1/1/2/0/0/0                                   | 1/1/1/0/0/0                               | 0/0/0/1/0/28                              | 0/0/0/1/0/28                              |
| <i>B</i> factors (Å <sup>2</sup> )                  |                                           |                                           |                                               |                                           |                                           |                                           |
| Protein                                             | 0.00/953.69/2                             | 7.39/66.45/27                             | 0.00/973.01/1                                 | 0.00/212.14/7                             | 9.60/999.00/1                             | 12.00/837.35/                             |
|                                                     | 87.42                                     | .03                                       | 10.90                                         | 1.23                                      | 50.77                                     | 116.52                                    |
| Ligand                                              | 46.06/483.76/                             | 8.88/45.41/20                             | 28.27/379.00/                                 | 14.48/197.31/                             | 8.49/999.00/7                             | 14.58/681.50/                             |
|                                                     | 367.74                                    | .21                                       | 95.70                                         | 65.91                                     | 79.45                                     | 478.93                                    |
| R.m.s. deviations                                   |                                           |                                           |                                               |                                           |                                           |                                           |
| Bond lengths (Å)                                    | 0.008 (36)                                | 0.004 (22)                                | 0.008 (36)                                    | 0.008 (43)                                | 0.008 (3)                                 | 0.008 (6)                                 |
| Bond angles (°)                                     | 0.872 (27)                                | 0.797 (12)                                | 0.885 (26)                                    | 0.906 (26)                                | 1.211 (65)                                | 1.464                                     |
| Validation                                          |                                           |                                           |                                               |                                           |                                           |                                           |
| MolProbity score                                    | 1.27                                      | 0.95                                      | 1.33                                          | 1.27                                      | 2.33                                      | 2.00                                      |
| Clashscore                                          | 3.05                                      | 1.86                                      | 3.59                                          | 3.11                                      | 12.22                                     | 7.14                                      |
| Poor rotamers (%)                                   | 0.08                                      | 0.04                                      | 0.10                                          | 0.11                                      | 3.55                                      | 1.99                                      |
| Ramachandran plot                                   |                                           |                                           |                                               |                                           |                                           |                                           |
| Favored (%)                                         | 96.98                                     | 98.82                                     | 96.97                                         | 97.04                                     | 95.56                                     | 94.44                                     |
| Allowed (%)                                         | 2.98                                      | 3.04                                      | 2.98                                          | 2.91                                      | 4.40                                      | 5.48                                      |
| Disallowed (%)                                      | 0.04                                      | 0.05                                      | 0.05                                          | 0.05                                      | 0.05                                      | 0.09                                      |

<sup>1</sup> Values reported by CryoSPARC Local Resolution Estimation inside the refinement mask.

## Supplementary References

1. Jumper, J. *et al.* Highly accurate protein structure prediction with AlphaFold. *Nature* **596**, 583–589 (2021).
2. Varadi, M. *et al.* AlphaFold Protein Structure Database: massively expanding the structural coverage of protein-sequence space with high-accuracy models. *Nucleic Acids Res.* **50**, D439–D444 (2022).
3. Ruzheinikov, S. N. *et al.* Analysis of the Open and Closed Conformations of the GTP-binding Protein YsxC from *Bacillus subtilis*. *J. Mol. Biol.* **339**, 265–278 (2004).
4. Jaskolowski, M. *et al.* Structural Insights into the Mechanism of Mitoribosomal Large Subunit Biogenesis. *Mol. Cell* **79**, 629-644.e4 (2020).
5. Bogenhagen, D. F., Ostermeyer-Fay, A. G., Haley, J. D. & Garcia-Diaz, M. Kinetics and Mechanism of Mammalian Mitochondrial Ribosome Assembly. *Cell Rep.* **22**, 1935–1944 (2018).
6. Tegunov, D. & Cramer, P. Real-time cryo-electron microscopy data preprocessing with Warp. *Nat. Methods* **16**, 1146–1152 (2019).
7. Dai, M., Dong, Z., Xu, K. & Zhang, Q. C. CryoRes: Local Resolution Estimation of Cryo-EM Density Maps by Deep Learning. *J. Mol. Biol.* **435**, 168059 (2023).
