# Supplementary material for: GTPBP8 plays a role in mitoribosome formation in human mitochondria
Source: PubMed Central journal article supplement (PMC11229512; doi:10.1038/s41467-024-50011-x), 2024-07-05
Supplement: 41467_2024_50011_MOESM3_ESM.pdf [file 41467_2024_50011_MOESM3_ESM.pdf]

## **Description of Additional Supplementary Files**

### **File name: Supplementary Data 1**

Description: Label-free quantitative (LFQ) mass spectrometry analysis of FLAG-IP of GTPBP8::FLAG.

### **File name: Supplementary Data 2**

Description: Label-free quantitative (LFQ) mass spectrometry analysis of the GTPBP8-BioID experiment.

### **File name: Supplementary Data 3**

Description: LFQ mass spectrometry analyses of mitoproteome of GTPBP8 knock-out cell lines compared to HEK293.
